# Supplementary material
Source: MDPI journal article supplement (https://www.mdpi.com/2073-4395/10/4/591)
Supplement: s1 [file s1]

## Supplementary Materials

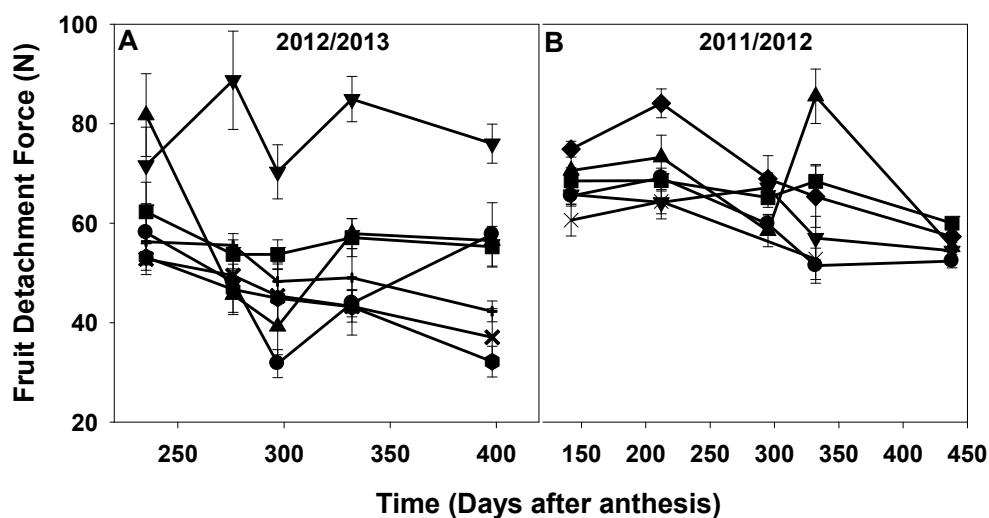

**Figure S1.** FDF kinetics in Corsica during fruit maturation in two consecutive seasons. **A)** In 2012/2013, FDF values measured over time in 'Maltaise demi-sanguine' (●), 'Navelate' (▲), 'Lane late' (◆), 'Navelina' (▼), 'Washington navel' (■) and 'Newhall navel' (×). **B)** In 2011/2012, FDF was measured over time in 'Moro' (◊), 'Navelate' (●), 'Hamlin' (×), 'Salutiana' (■), 'Shamouti' (—), 'Navelina' (◆), 'Valencia late' (▼) and 'Washington navel' (▲). Values are means  $\pm$  SE (n = 12). Anthesis occurred in the third week of April in 2011 and in the fourth week of April in 2012.

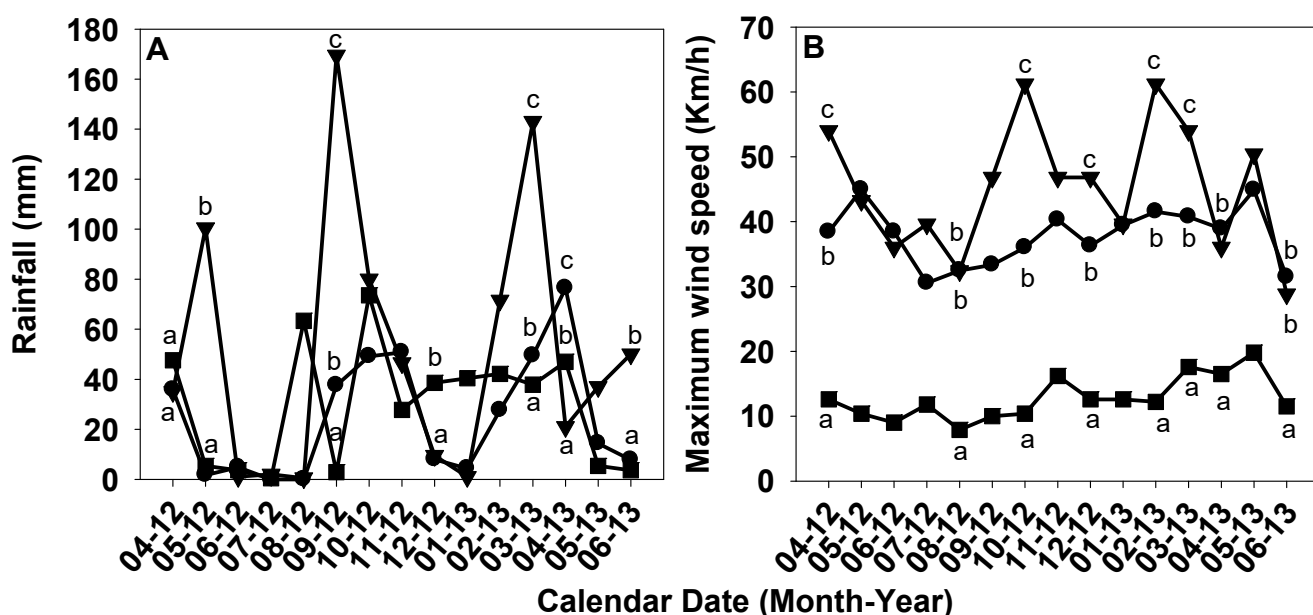

**Figure S2.** Climatic data recorded during the 2012/2013 season in Corsica (▼), Spain (●) and Tunisia (■). **A)** Rainfall (mm), **B)** Maximum wind speed (Km/h). The different letters indicate statistically significant differences ( $p \leq 0.05$ ).
